# Supplementary material for: Extracellular and Intracellular Polyphenol Oxidases Cause Opposite Effects on Sensitivity of Streptomyces to Phenolics: A Case of Double-Edged Sword
Source: PubMed Central journal article supplement (PMC2758597; doi:10.1371/journal.pone.0007462), 2009-10-14
Supplement: pone.0007462.s003.pdf [file pone.0007462.s003.pdf]

**Table S1.** Predicted Tat signal peptide and motifs in MelC1 and MelD1 proteins based on TatP (version 1.0)

| Features                      | Tat signal peptide | Tat motif | Cleavage | Position |
|-------------------------------|--------------------|-----------|----------|----------|
| MelC1                         |                    |           |          |          |
| <i>S. antibioticus</i>        | Y                  | RRRAL     | ARA-DD   | 30-31    |
| <i>S. avermitilis</i>         | Y                  | RRHAL     | ASA-AG   | 32-33    |
| <i>S. glaucescens</i>         | Y                  | RRRAL     | ATA-AG   | 32-33    |
| <i>S. scabies</i>             | Y                  | RRHAL     | AAA-DE   | 28-29    |
| <i>S. galbus</i>              | Y                  | (RRRAY)*  | APA-AT   | 30-31    |
| <i>S. castaneoglobisporus</i> | Y                  | RRRAL     | ASA-AG   | 33-34    |
| <i>S. tanashiensis</i>        | Y                  | RRRAL     | AVA-AP   | 31-32    |
| <i>S. lincolnensis</i>        | Y                  | RRRAL     | AAA-HD   | 36-37    |
| <i>S. griseus</i>             | N                  | RRQAL     | VPA-GT   | 35-36    |
| MelD1                         |                    |           |          |          |
| <i>S. avermitilis</i>         | N                  | N         | N        | N        |
| <i>S. griseus</i>             | Y                  | N         | APA-AP   | 26-27    |
| <i>S. coelicolor</i>          | Y                  | N         | AEA-AT   | 28-29    |
| <i>S. scabies</i>             | Y                  | RRNAL     | VVA-AV   | 40-41    |
| <i>S. griseus</i> GriE        | Y                  | RREMV     | EGA-AE   | 34-35    |

\* No Tat motif pattern (-RR-X-[FGAVML][LITMV]) was found, but this similar sequence is present.
